# Supplementary material for: Supramolecular biosolvents made up of self-assembled rhamnolipids: synthesis and characterization
Source: Royal Society of Chemistry journal article supplement (doi:10.1039/d0gc02078h), 2020-01-01
Supplement: d0gc02078h1.pdf [file d0gc02078h1.pdf]

## **ELECTRONIC SUPPLEMENTARY INFORMATION (ESI)**

### **Supramolecular biosolvents made up of self-assembled rhamnolipids: synthesis and characterization**

**Encarnación Romera-García<sup>1</sup>, Ana Ballesteros-Gómez<sup>1\*</sup>, Soledad Rubio<sup>1</sup>**

<sup>1</sup>Department of Analytical Chemistry, University Institute of Nanochemistry, Faculty of Science, University of Córdoba, Marie Curie Annex Building, Campus of Rabanales, 14071 Córdoba, Spain

\*Corresponding author. Tel.: +34 957 218 644; fax: +34 957 218 644. E-mail address: ana.ballesteros@uco.es.

## Table of contents

| Figures                                                                                                                                                                                                                                       | Page  |
|-----------------------------------------------------------------------------------------------------------------------------------------------------------------------------------------------------------------------------------------------|-------|
| <b>Figure ESI1.</b> General scheme for the synthesis of supramolecular solvents                                                                                                                                                               | ESI4  |
| <b>Figure ESI2.</b> Chemical structures of Rha-C10-C10 (A) and Rha-Rha-C10-C10 (B)                                                                                                                                                            | ESI5  |
| <b>Figure ESI3.</b> Variation of the slopes of the linear regression lines of SUPRAS volume ( $\mu\text{L}\cdot\text{mL}^{-1}$ mixture) versus rhamnolipid percentage (w/v), as a function of salt concentration (M) in the synthesis mixture | ESI6  |
| <b>Figure ESI4.</b> Volume of bioSUPRAS ( $\mu\text{L}\cdot\text{mL}^{-1}$ mixture) versus initial concentration of rhamnolipid (% w/v), at two concentrations of salt (A: 1.50 M; B: 1.75 M)                                                 | ESI7  |
| <b>Figure ESI5.</b> Agreement between the measured volumes of bioSUPRASs ( $\mu\text{L}\cdot\text{mL}^{-1}$ mixture) and those calculated using the proposed equations (A: NaCl; B: $\text{Na}_2\text{SO}_4$ )                                | ESI8  |
| <b>Figure ESI6.</b> Water content in bioSUPRASs (% w/w) formed using different initial concentrations of salts (M) and rhamnolipid (1.8-9%, w/v)                                                                                              | ESI9  |
| <b>Figure ESI7.</b> Optical micrograph of a bioSUPRAS produced from a mixture containing 4.5% of rhamnolipid (w/v) and 0.85 M of $\text{NH}_4\text{CH}_3\text{CO}_2$                                                                          | ESI10 |
| <b>Figure ESI8.</b> Chemical structures of trypan blue (A) and malachite green oxalate salt (B)                                                                                                                                               | ESI11 |

## Table of contents

| Tables                                                                                                                                                                                                                                                                          | Page     |
|---------------------------------------------------------------------------------------------------------------------------------------------------------------------------------------------------------------------------------------------------------------------------------|----------|
| <b>Table ESI1.</b> Critical aggregation concentration (mM) reported for colloidal systems produced from pure and mixed rhamnolipids under different experimental conditions                                                                                                     | ESI12    |
| <b>Table ESI2.</b> Slopes and correlation coefficients calculated from the linear regression lines of SUPRAS volume ( $\mu\text{L}\cdot\text{mL}^{-1}$ mixture) as a function of rhamnolipid percentage (w/v) in the colloidal system, at different concentrations of salts (M) | ESI13    |
| <b>Table ESI3.</b> Density values ( $\text{g}\cdot\text{mL}^{-1}$ ) of bioSUPRASs formed from different NaCl (M) and rhamnolipid (% w/v) concentrations                                                                                                                         | ESI14    |
| <b>Table ESI4.</b> Density values ( $\text{g}\cdot\text{mL}^{-1}$ ) of bioSUPRASs formed from different $\text{Na}_2\text{SO}_4$ (M) and rhamnolipid (% w/v) concentrations                                                                                                     | ESI15    |
| <b>Table ESI5.</b> Morphology and size distribution of anionic rhamnolipids at different concentrations of biosurfactant ( $\text{g}\cdot\text{L}^{-1}$ ) and salt (M)                                                                                                          | ESI16-17 |
| <b>Table ESI6.</b> Comparison of environmental/health and sustainability concerns and market prices for different SUPRAS developed in extraction processes.                                                                                                                     | ESI18-19 |

Figure ESI1. General scheme for the synthesis of supramolecular solvents

*Concentration-induced self-assembly*

*Environmental conditions-induced coacervation*

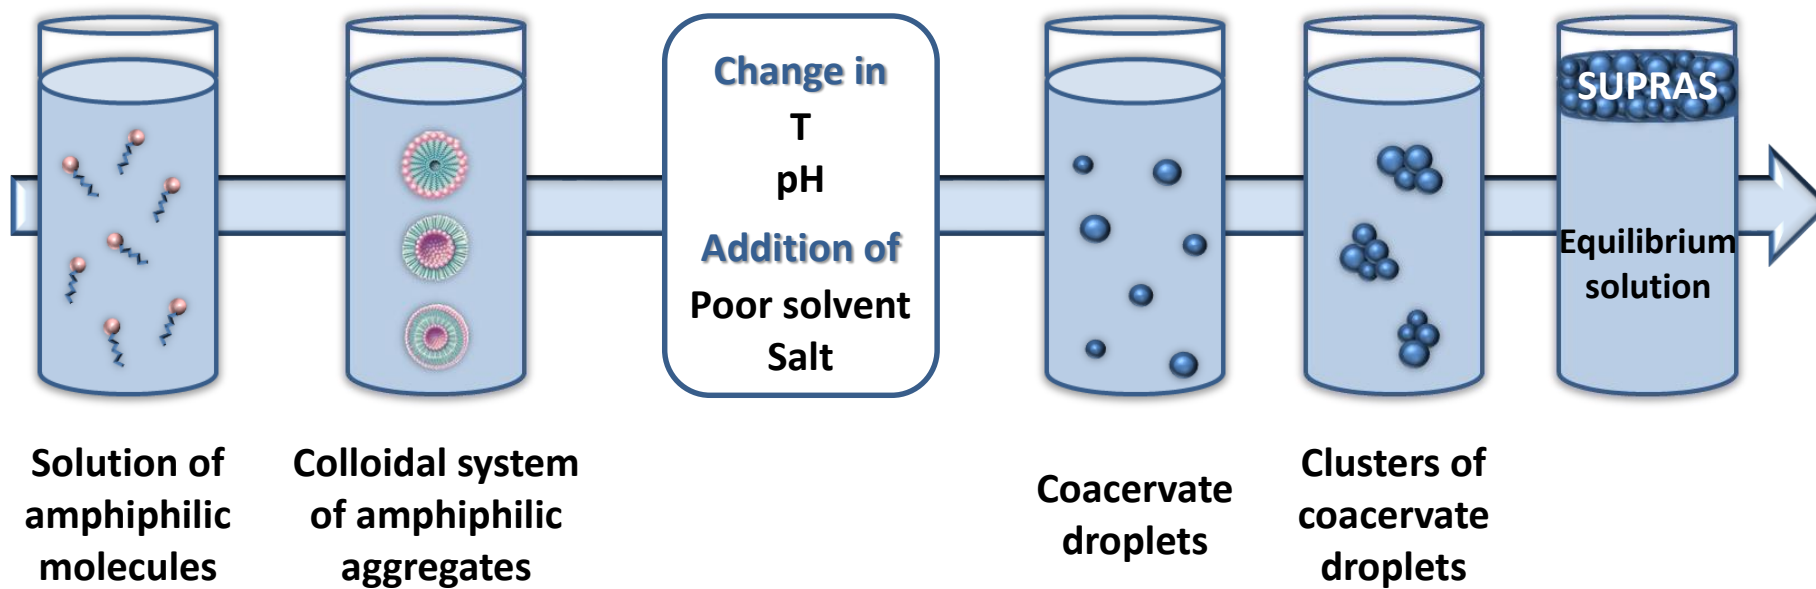

**Figure ESI2.** Chemical structures of Rha-C10-C10 (A) and Rha-Rha-C10-C10 (B)

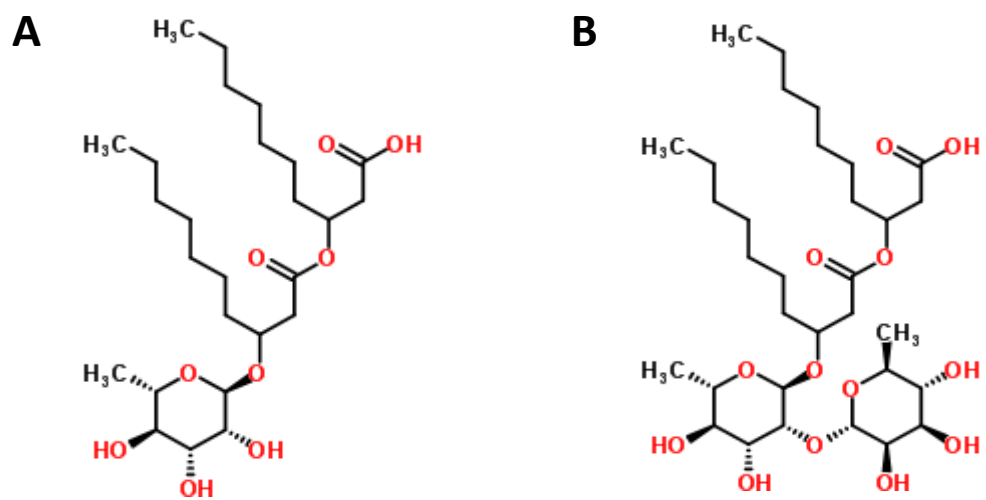

**Figure ESI3.** Variation of the slopes of the linear regression lines of SUPRAS volume ( $\mu\text{L}\cdot\text{mL}^{-1}$  mixture) versus rhamnolipid percentage (w/v), as a function of salt concentration (M) in the synthesis mixture

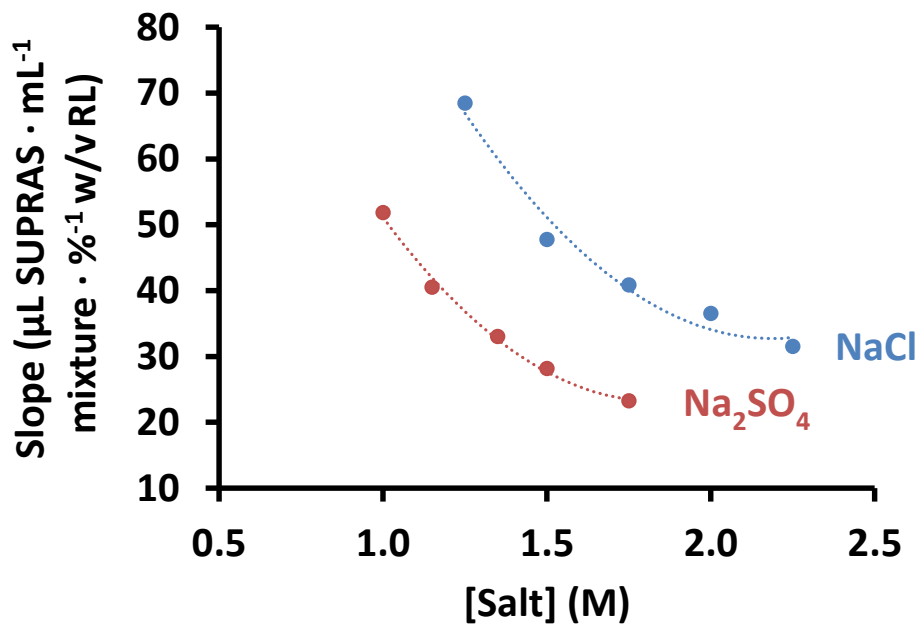

**Figure ESI4.** Volume of bioSUPRAS ( $\mu\text{L}\cdot\text{mL}^{-1}$  mixture) versus initial concentration of rhamnolipid (% w/v), at two concentrations of salt (A: 1.50 M; B: 1.75 M)

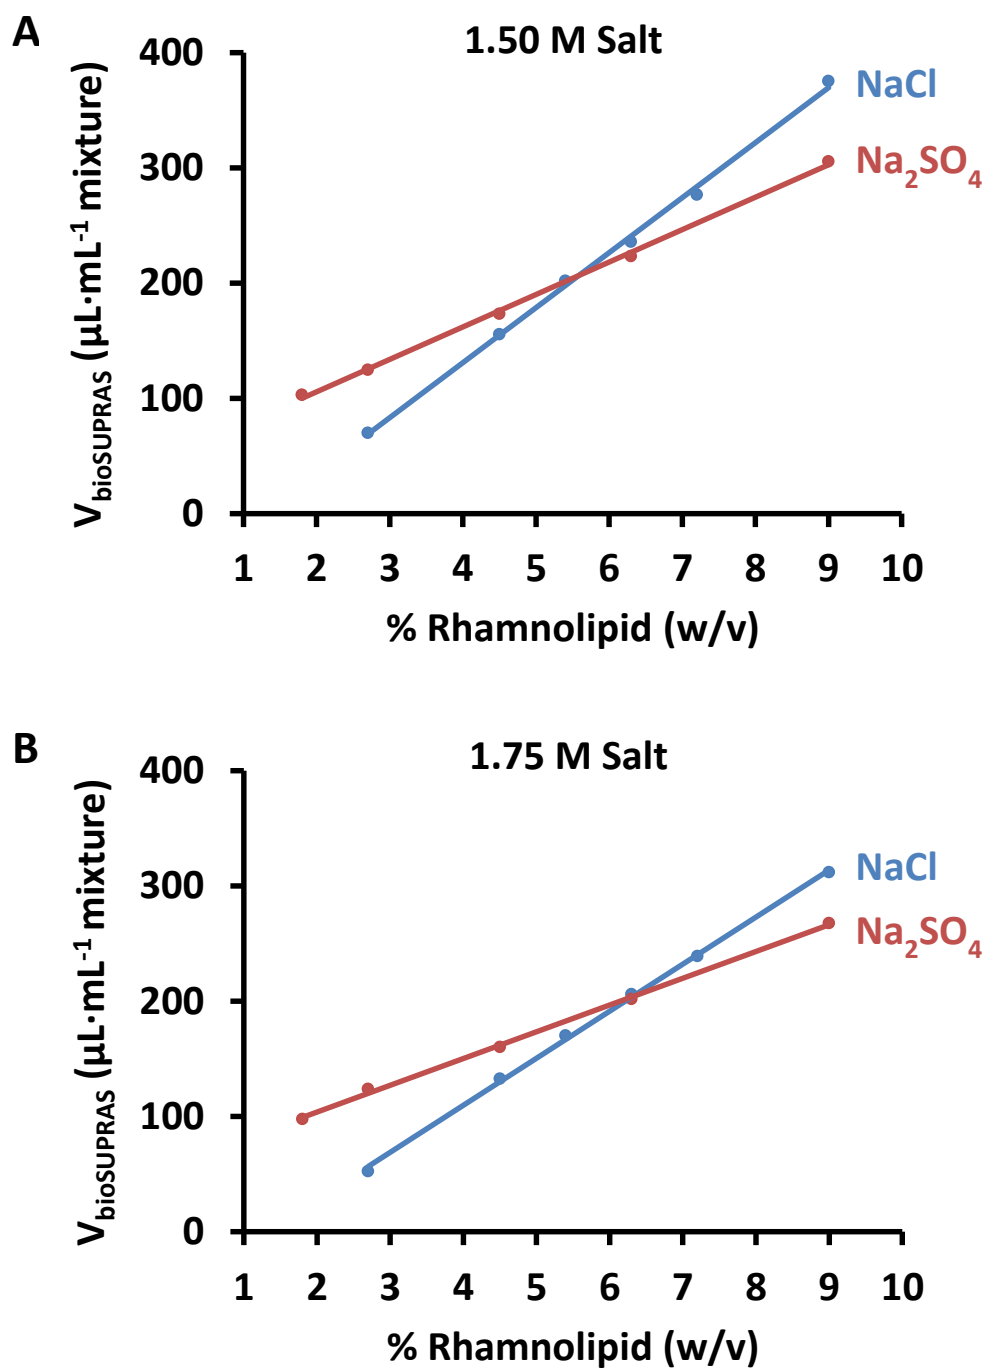

**Figure ESI5.** Agreement between the measured volumes of bioSUPRASs ( $\mu\text{L}\cdot\text{mL}^{-1}$  mixture) and those calculated using the proposed equations (A: NaCl; B:  $\text{Na}_2\text{SO}_4$ )

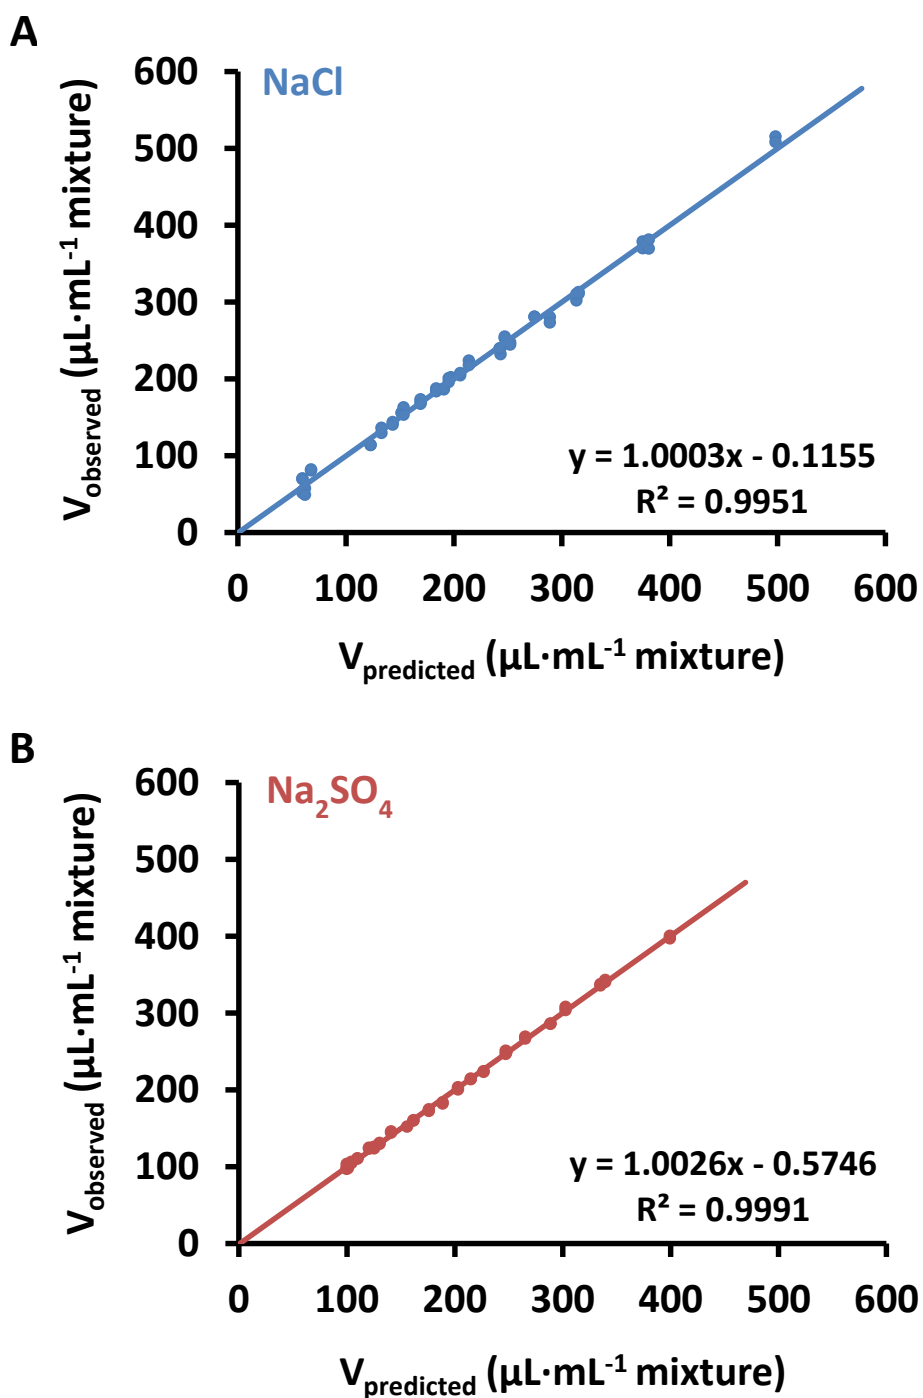



**Figure ESI6.** Water content in bioSUPRASs (% w/w) formed using different initial concentrations of salts (M) and rhamnolipid (1.8-9%, w/v)

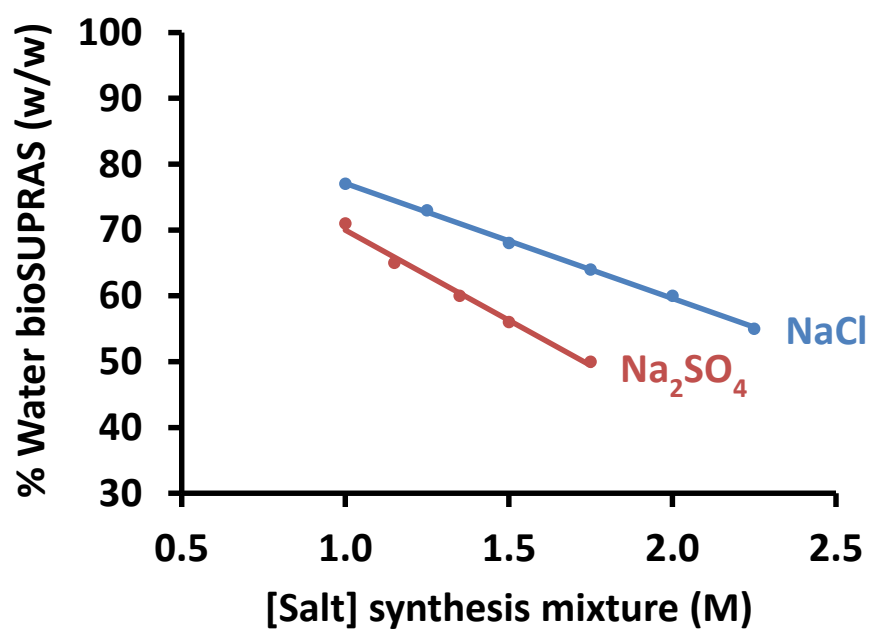

**Figure ESI7.** Optical micrograph of a bioSUPRAS produced from a mixture containing 4.5% of rhamnolipid (w/v) and 0.85 M of  $\text{NH}_4\text{CH}_3\text{CO}_2$

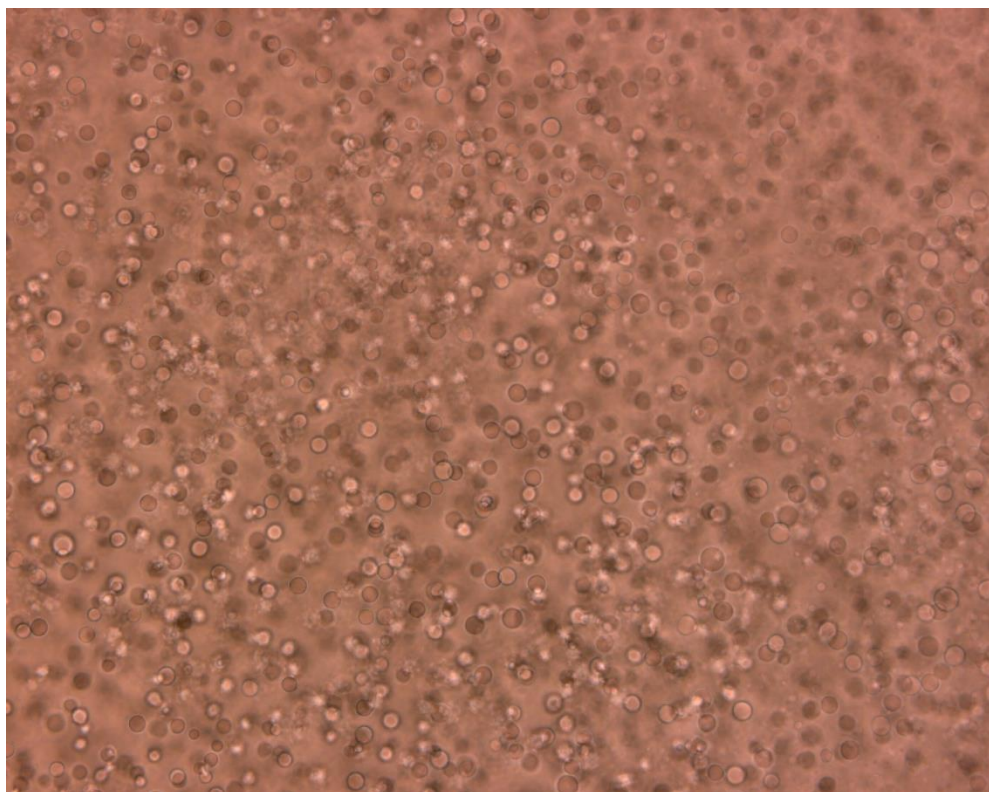

—| 50  $\mu\text{m}$

**Figure ESI8.** Chemical structures of trypan blue (A) and malachite green oxalate salt (B)

**A**

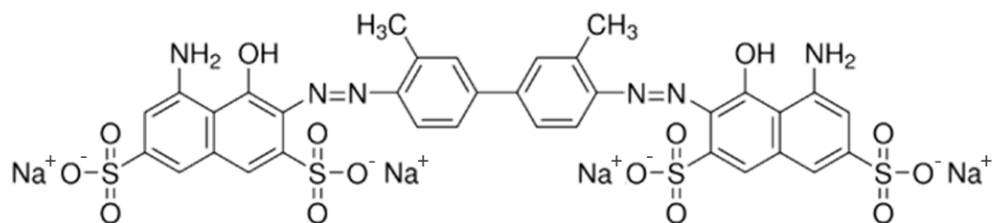

**B**

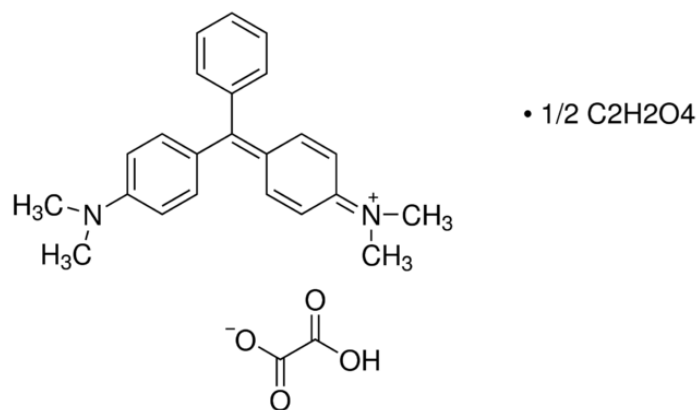

**Table ESI1.** Critical aggregation concentration (mM) reported for colloidal systems produced from pure and mixed rhamnolipids under different experimental conditions

| Composition of rhamnolipid product                                                                                       | Production of colloidal systems |                                         | Reference |
|--------------------------------------------------------------------------------------------------------------------------|---------------------------------|-----------------------------------------|-----------|
|                                                                                                                          | Experimental conditions         | Critical aggregation concentration (mM) |           |
| Rha-Rha-C <sub>10</sub> -C <sub>10</sub> (50%)<br>Rha-Rha- C <sub>10</sub> -C <sub>12</sub> (29%)<br>Impurities (21%)    | pH 4.0                          | 0.01                                    | [52]      |
|                                                                                                                          | pH 7.4                          | 0.50                                    |           |
|                                                                                                                          | pH 4.0, 0.15 M NaCl             | 0.01                                    |           |
|                                                                                                                          | pH 7.4, 0.15 M NaCl             | 0.11                                    |           |
|                                                                                                                          | pH 7.4, 0.50 M NaCl             | 0.10                                    |           |
| Rha-C <sub>10</sub> -C <sub>10</sub><br>Rha- C <sub>10</sub> -C <sub>12:1</sub><br>Rha- C <sub>10</sub> -C <sub>12</sub> | pH 4.0                          | 0.05                                    | [53]      |
|                                                                                                                          | pH 7.4                          | 0.25                                    |           |
|                                                                                                                          | pH 4.0, 0.1 M NaCl              | 0.05                                    |           |
|                                                                                                                          | pH 7.4, 0.1 M NaCl              | 0.04                                    |           |
| Rha-C <sub>10</sub> -C <sub>10</sub>                                                                                     | UHQ water                       | 0.04                                    | [49]      |
|                                                                                                                          | pH 7.0                          | 0.18                                    |           |
|                                                                                                                          | pH 9.0                          | 0.36                                    |           |
|                                                                                                                          | 0.5 M NaCl                      | 0.03                                    |           |
| Rha-Rha-C <sub>10</sub> -C <sub>10</sub>                                                                                 | UHQ water                       | 0.07                                    |           |
|                                                                                                                          | pH 7.0                          | 0.11                                    |           |
|                                                                                                                          | pH 9.0                          | 0.18                                    |           |
|                                                                                                                          | 0.5 M NaCl                      | 0.08                                    |           |
| Rha-C <sub>10</sub> -C <sub>10</sub> (30%)<br>Rha-Rha-C <sub>10</sub> -C <sub>10</sub> (70%)                             | pH 9                            | 0.26                                    |           |
| Rha-C <sub>10</sub> -C <sub>10</sub> (50%)<br>Rha-Rha-C <sub>10</sub> -C <sub>10</sub> (50%)                             | pH 9                            | 0.34                                    |           |
| Rha-C <sub>10</sub> -C <sub>10</sub> (70%)<br>Rha-Rha-C <sub>10</sub> -C <sub>10</sub> (30%)                             | pH 9                            | 0.34                                    |           |
| Rha-C <sub>10</sub> -C <sub>10</sub>                                                                                     | UHQ water                       | 0.1                                     |           |
|                                                                                                                          | 0.05 M NaCl                     | 0.1                                     |           |
|                                                                                                                          | 0.50 M NaCl                     | 0.05                                    |           |
|                                                                                                                          | 1 M NaCl                        | 0.04                                    |           |
| Rha-Rha-C <sub>10</sub> -C <sub>10</sub>                                                                                 | UHQ water                       | 0.15                                    | [48]      |
|                                                                                                                          | 0.05 M NaCl                     | 0.08                                    |           |
|                                                                                                                          | 0.50 M NaCl                     | 0.08                                    |           |
|                                                                                                                          | 1 M NaCl                        | 0.04                                    |           |
| Rha-C <sub>10</sub> -C <sub>10</sub>                                                                                     | UHQ water                       | 0.10                                    | [48]      |
|                                                                                                                          | 0.375 M NaCl                    | 0.05                                    |           |
|                                                                                                                          | 0.875 M NaCl                    | 0.05                                    |           |
| Rha-Rha-C <sub>10</sub> -C <sub>10</sub>                                                                                 | UHQ water                       | 0.02                                    | [48]      |
|                                                                                                                          | 0.375 M NaCl                    | 0.02                                    |           |
|                                                                                                                          | 0.875 M NaCl                    | 0.02                                    |           |

**Table ESI2.** Slopes and correlation coefficients calculated from the linear regression lines of SUPRAS volume ( $\mu\text{L}\cdot\text{mL}^{-1}$  mixture) as a function of rhamnolipid percentage (w/v) in the colloidal system, at different concentrations of salts (M)

| Synthesis conditions                   | Slope ( $\mu\text{L SUPRAS} \cdot \text{mL}^{-1}$<br>mixture $\cdot \%^{-1}$ w/v RL) | Correlation coefficient |
|----------------------------------------|--------------------------------------------------------------------------------------|-------------------------|
| 1.25 M NaCl                            | 64.49                                                                                | 0.9958                  |
| 1.50 M NaCl                            | 47.75                                                                                | 0.9977                  |
| 1.75 M NaCl                            | 40.85                                                                                | 0.9988                  |
| 2.00 M NaCl                            | 36.53                                                                                | 0.9975                  |
| 2.25 M NaCl                            | 31.08                                                                                | 0.9999                  |
| 1.00 M Na <sub>2</sub> SO <sub>4</sub> | 51.81                                                                                | 0.9995                  |
| 1.15 M Na <sub>2</sub> SO <sub>4</sub> | 40.49                                                                                | 0.9998                  |
| 1.35 M Na <sub>2</sub> SO <sub>4</sub> | 33.03                                                                                | 0.9992                  |
| 1.50 M Na <sub>2</sub> SO <sub>4</sub> | 28.15                                                                                | 0.9987                  |
| 1.75 M Na <sub>2</sub> SO <sub>4</sub> | 23.23                                                                                | 0.9987                  |

**Table ESI3.** Density values ( $\text{g}\cdot\text{mL}^{-1}$ ) of bioSUPRASs formed from different NaCl (M) and rhamnolipid (% w/v) concentrations

| <i>Synthesis conditions</i> |            | <i>bioSUPRAS</i>                                       |
|-----------------------------|------------|--------------------------------------------------------|
| % Rhamnolipid (w/v)         | [NaCl] (M) | $\rho \pm \text{SD}$ ( $\text{g}\cdot\text{mL}^{-1}$ ) |
| 1.8                         | 1.00       | 1.07±0.01                                              |
| 1.8                         | 1.25       | 1.05±0.02                                              |
| 1.8                         | 1.50       | 1.08±0.01                                              |
| 1.8                         | 1.75       | 1.06±0.02                                              |
| 2.7                         | 1.00       | 1.063±0.001                                            |
| 2.7                         | 1.25       | 1.07±0.02                                              |
| 2.7                         | 1.50       | 1.06±0.02                                              |
| 2.7                         | 1.75       | 1.081±0.008                                            |
| 2.7                         | 2.00       | 1.067±0.007                                            |
| 4.5                         | 1.25       | 1.088±0.008                                            |
| 4.5                         | 1.50       | 1.073±0.009                                            |
| 4.5                         | 1.75       | 1.071±0.008                                            |
| 4.5                         | 2.00       | 1.09±0.01                                              |
| 5.4                         | 1.25       | 1.07±0.01                                              |
| 5.4                         | 1.50       | 1.083±0.003                                            |
| 5.4                         | 1.75       | 1.075±0.001                                            |
| 5.4                         | 2.00       | 1.08±0.02                                              |
| 5.4                         | 2.25       | 1.092±0.001                                            |
| 6.3                         | 1.25       | 1.08±0.03                                              |
| 6.3                         | 1.50       | 1.09±0.01                                              |
| 6.3                         | 1.75       | 1.09±0.01                                              |
| 6.3                         | 2.00       | 1.08±0.01                                              |
| 6.3                         | 2.25       | 1.10±0.02                                              |
| 9.0                         | 1.25       | 1.081±0.005                                            |
| 9.0                         | 1.50       | 1.05±0.01                                              |
| 9.0                         | 1.75       | 1.11±0.02                                              |
| 9.0                         | 2.00       | 1.078±0.004                                            |
| 9.0                         | 2.25       | 1.08±0.02                                              |

**Table ESI4.** Density values ( $\text{g}\cdot\text{mL}^{-1}$ ) of bioSUPRASs formed from different  $\text{Na}_2\text{SO}_4$  (M) and rhamnolipid (% w/v) concentrations

| <i>Synthesis conditions</i> |                                | <i>bioSUPRAS</i>                                       |
|-----------------------------|--------------------------------|--------------------------------------------------------|
| % Rhamnolipid (w/v)         | $[\text{Na}_2\text{SO}_4]$ (M) | $\rho \pm \text{SD}$ ( $\text{g}\cdot\text{mL}^{-1}$ ) |
| 1.8                         | 1.00                           | 1.07±0.04                                              |
| 1.8                         | 1.15                           | 1.10±0.02                                              |
| 1.8                         | 1.35                           | 1.04±0.01                                              |
| 1.8                         | 1.50                           | 1.11±0.02                                              |
| 1.8                         | 1.75                           | 1.12±0.01                                              |
| 2.7                         | 1.00                           | 1.12±0.04                                              |
| 2.7                         | 1.15                           | 1.087±0.007                                            |
| 2.7                         | 1.35                           | 1.117±0.003                                            |
| 2.7                         | 1.50                           | 1.10±0.02                                              |
| 2.7                         | 1.75                           | 1.10±0.05                                              |
| 4.5                         | 1.00                           | 1.11±0.03                                              |
| 4.5                         | 1.15                           | 1.142±0.009                                            |
| 4.5                         | 1.35                           | 1.13±0.02                                              |
| 4.5                         | 1.50                           | 1.035±0.005                                            |
| 4.5                         | 1.75                           | 1.10±0.06                                              |
| 6.3                         | 1.00                           | 1.13±0.02                                              |
| 6.3                         | 1.15                           | 1.13±0.02                                              |
| 6.3                         | 1.35                           | 1.12±0.04                                              |
| 6.3                         | 1.50                           | 1.136±0.008                                            |
| 6.3                         | 1.75                           | 1.11±0.003                                             |
| 9.0                         | 1.00                           | 1.10±0.06                                              |
| 9.0                         | 1.15                           | 1.07±0.06                                              |
| 9.0                         | 1.35                           | 1.16±0.01                                              |
| 9.0                         | 1.50                           | 1.149±0.001                                            |
| 9.0                         | 1.75                           | 1.13±0.02                                              |

**Table ES15.** Morphology and size distribution of anionic rhamnolipids at different concentrations of biosurfactant ( $\text{g}\cdot\text{L}^{-1}$ ) and salt (M)

| Composition of rhamnolipid product                                                                                   | Experimental conditions               |     |                               | Hydrodynamic diameter range or mean (nm)                                  | Aggregate morphology (electron microscopy)                                                                                                                                  | Reference |
|----------------------------------------------------------------------------------------------------------------------|---------------------------------------|-----|-------------------------------|---------------------------------------------------------------------------|-----------------------------------------------------------------------------------------------------------------------------------------------------------------------------|-----------|
|                                                                                                                      | Rhamnolipid                           | pH  | NaCl                          |                                                                           |                                                                                                                                                                             |           |
| Rha-Rha-C <sub>10</sub> -C <sub>10</sub> (50%)<br>Rha-Rha-C <sub>10</sub> -C <sub>12</sub> (29%)<br>Impurities (21%) | <0.7 $\text{g}\cdot\text{L}^{-1}$     | 7.4 | 0.15 M                        | Bimodal distribution (43-66; 350-550)                                     | Spherical vesicles (150-200 nm); elongated vesicles with lengths >1000 nm and aggregated structures of larger size                                                          | [52]      |
|                                                                                                                      | > 1.8 $\text{g}\cdot\text{L}^{-1}$    | 7.4 | 0.15 M                        | > 1500                                                                    |                                                                                                                                                                             |           |
| Rha-C <sub>10</sub> -C <sub>10</sub>                                                                                 | 0.07-0.7 $\text{g}\cdot\text{L}^{-1}$ | 6.8 | 0.05-1 M                      | Not reported                                                              | Morphology transition from spherical micelles to bilayer structures and to hexagonal (rod shaped) micelles, for both monoRha and diRha, with increasing NaCl concentration. | [54]      |
| Rha-Rha-C <sub>10</sub> -C <sub>10</sub>                                                                             | 0.07-0.7 $\text{g}\cdot\text{L}^{-1}$ | 6.8 | 0.05-1 M                      |                                                                           |                                                                                                                                                                             |           |
| Rha-C <sub>10</sub> -C <sub>10</sub>                                                                                 | 1 $\text{g}\cdot\text{L}^{-1}$        |     | No salt<br>0.375 M<br>0.875 M | 140.3±2.0 (PDI 0.263)<br>2212±444.1 (PDI 0.890)<br>4674±359.8 (PDI 1.0)   |                                                                                                                                                                             |           |
| Rha-Rha-C <sub>10</sub> -C <sub>10</sub>                                                                             | 0.5 $\text{g}\cdot\text{L}^{-1}$      |     | No salt<br>0.375 M<br>0.875 M | 133.1±4.9 (PDI 0.373)<br>>10000<br>>10000                                 | NaCl 0.875 M: Giant vesicle-like structures (in the $\mu\text{m}$ range) by self-assembling of the crude RL mixture and spherical structures for mono-RLs and di-RLs.       | [48]      |
| Rha-C <sub>10</sub> -C <sub>10</sub> (10%)<br>Rha-Rha-C <sub>10</sub> -C <sub>10</sub> (30%)<br>Impurities (60%)     | 1.5 $\text{g}\cdot\text{L}^{-1}$      |     | No salt<br>0.375 M<br>0.875 M | 302.8±7.4 (PDI 0.549)<br>456.6±42.2 (PDI 0.596)<br>2343±154.1 (PDI 0.753) |                                                                                                                                                                             |           |

PDI: polydispersity index



**Table ES15.** Morphology and size distribution of anionic rhamnolipids at different concentrations of biosurfactant (g·L<sup>-1</sup>) and salt (M)

| Composition of rhamnolipid product                                                                                                                                                                                                                                                                                                                                       | Experimental conditions |     |        | Hydrodynamic diameter range or mean (nm)              | Aggregate morphology (electron microscopy) | Reference |
|--------------------------------------------------------------------------------------------------------------------------------------------------------------------------------------------------------------------------------------------------------------------------------------------------------------------------------------------------------------------------|-------------------------|-----|--------|-------------------------------------------------------|--------------------------------------------|-----------|
|                                                                                                                                                                                                                                                                                                                                                                          | Rhamnolipid             | pH  | NaCl   |                                                       |                                            |           |
| Mixture 1 (monoRha)<br>Rha-C <sub>14:2</sub> (3.1%)<br>Rha-C <sub>12:2</sub> (24 %)<br>Rha-C <sub>12</sub> -C <sub>10</sub> (14.1%)<br>Rha-C <sub>10</sub> -C <sub>12:1</sub> (5.0%)<br>Rha-C <sub>10</sub> -C <sub>10</sub> (43.4%)<br>Rha-C <sub>10:1</sub> -C <sub>8</sub> (4.5%)<br>Rha-Rha-C <sub>10</sub> -C <sub>10</sub> (5.9%)                                  | 1.8 g·L <sup>-1</sup>   | 6.8 | 0.01 M | Unimodal distribution (40-350)                        |                                            |           |
| Mixture 2: (DiRha)<br>Rha-Rha-C <sub>10</sub> -C <sub>14:1</sub> (4.1%)<br>Rha-Rha-C <sub>10</sub> -C <sub>12</sub> (2.2%)<br>Rha-Rha-C <sub>10</sub> -C <sub>12:1</sub> (37.5%)<br>Rha-Rha-C <sub>10</sub> -C <sub>10</sub> (45.1%)<br>Rha-Rha-C <sub>10</sub> -C <sub>8</sub> and<br>Rha-Rha-C <sub>8</sub> -C <sub>10</sub> (6.9%)<br>Rha-Rha-C <sub>10</sub> (4.12%) | 1.8 g·L <sup>-1</sup>   | 6.8 | 0.01 M | Multimodal distribution (4-10; 40-100; 200-500)       |                                            |           |
|                                                                                                                                                                                                                                                                                                                                                                          | 3.6 g·L <sup>-1</sup>   | 6.8 | 0.01 M | Multimodal distribution (10-40; 150-1000; 2000-4000)  | Not reported                               | [62]      |
| Crude extract containing mixture 1 (64%) and mixture 2 (36%)                                                                                                                                                                                                                                                                                                             | 1.8 g·L <sup>-1</sup>   | 6.8 | 0.01 M | Bimodal distribution (70-200; 400-1000)               |                                            |           |
|                                                                                                                                                                                                                                                                                                                                                                          | 3.6 g·L <sup>-1</sup>   | 6.8 | 0.01 M | Multimodal distribution (80-170; 500-2000; 2000-5000) |                                            |           |

**Table ES16.** Comparison of environmental/health and sustainability concerns and market prices for different SUPRAS developed in extraction processes

| Extraction of compounds/samples    | Surfactant(s) and solvents (percentage <sup>a</sup> )                                                                 | Coacervation-inducing agent <sup>b</sup>                                             | Environmental/health concerns and specific regulations <sup>c</sup>                                                                                                                                                                            | Sustainability concerns                                                       | Surfactant market price                                                         | Reference |
|------------------------------------|-----------------------------------------------------------------------------------------------------------------------|--------------------------------------------------------------------------------------|------------------------------------------------------------------------------------------------------------------------------------------------------------------------------------------------------------------------------------------------|-------------------------------------------------------------------------------|---------------------------------------------------------------------------------|-----------|
| Bixin and norbixin in food         | Octanoic acid (2%, v/v)<br>THF (35%, v/v)                                                                             | Poor solvent (type II water, 3.207 mL; H <sub>2</sub> O/THF volume ratio 1.80; pH 3) | Decanoic acid: harmful to aquatic life with long lasting effects.<br>THF is <b>suspected of causing cancer</b> , highly flammable. Included in the Community rolling action plan (CoRAP).<br>Other: acid conditions needed.                    | Synthetic surfactant and organic solvent.<br>Mild acidic synthesis conditions | Carboxylic acids:<br>\$ 0.5-2/kg                                                | [64]      |
| Xanthohumol in beer                | Triton X-114 (2.5%, v/v)<br>Water content in sample, pH 5                                                             | Temperature (70 °C) and salt (NaCl, 15% w/v)                                         | Triton X-114 is an <b>endocrine disruptor</b> , very toxic to aquatic life, with long lasting effects, harmful if swallowed and suspected of damaging fertility or the unborn child. It is classified as substance of very high concern (SVHC) | Synthetic surfactant.<br>High temperature synthesis conditions                | Triton series:<br>\$ 2-10/kg                                                    | [65]      |
| Vitamin E in water                 | Sodium dodecane sulphonic acid, SDSA (1%, w/v)<br>Water sample                                                        | Acid (HCl, 4.2 M)                                                                    | -                                                                                                                                                                                                                                              | Synthetic surfactant.<br>Strong acidic synthesis conditions                   | SDSA:<br>\$ 1-1.5/kg                                                            | [66]      |
| Erythrosine and tartrazine in food | Triton X-100 (~2%, w/v)<br>Cetyl trimethyl ammonium bromide, CTAB (~6·10 <sup>-4</sup> %, w/v), type II water, pH 2.5 | Temperature (70 °C) and salt (KCl, 0.1% w/v)                                         | Triton X-100 is an <b>endocrine disruptor</b> very toxic to aquatic life with long lasting effects, causes serious eye damage, harmful if swallowed. It is classified as substance of very high concern (SVHC)                                 | Synthetic surfactant.<br>High temperature synthesis conditions                | Triton series:<br>\$ 2-10/kg<br>Cetyl trimethyl ammonium bromide:<br>\$ 1-10/kg | [67]      |

<sup>a</sup> Percentage of each compound in the synthesis mixture.

<sup>b</sup> In the case of water-induced coacervation, water volume per sample and H<sub>2</sub>O/solvent volume ratio are indicated.

<sup>c</sup>EU ECHA database (hazards regarding eye or skin or respiratory irritation not included).

**Table ES16.** Comparison of environmental/health and sustainability concerns and market prices for different SUPRAS developed in extraction processes

| Extraction of compounds/samples         | Surfactant(s) and solvents (percentage <sup>a</sup> )           | Coacervation-inducing agent <sup>b</sup>                                                                                       | Environmental/health concerns and specific regulations <sup>c</sup>                                                                                                                                                                                                                                                                                                                                                                                                   | Sustainability concerns                                                    | Surfactant market price       | Reference  |
|-----------------------------------------|-----------------------------------------------------------------|--------------------------------------------------------------------------------------------------------------------------------|-----------------------------------------------------------------------------------------------------------------------------------------------------------------------------------------------------------------------------------------------------------------------------------------------------------------------------------------------------------------------------------------------------------------------------------------------------------------------|----------------------------------------------------------------------------|-------------------------------|------------|
| Perfluoroalkyl compounds in blood serum | Hexanoic acid (6.5%, v/v), THF (40%, v/v)                       | Poor solvent (water content in sample; ~765 $\mu$ L/volume ratio H <sub>2</sub> O/THF 1.28, acid pH                            | THF: see first table row                                                                                                                                                                                                                                                                                                                                                                                                                                              | Synthetic surfactant and organic solvent. Mild acidic synthesis conditions | Carboxylic acids: \$ 0.5-2/kg | [68]       |
| Chlorophenols in river water            | Cetrimide (0.5%, w/v)<br>1-octanol (0.08%, v/v)<br>Water sample | Salt (NaCl, 37.8% w/v)                                                                                                         | Cetrimide: substance very toxic to aquatic life, harmful if swallowed, causes serious eye damage, may cause damage to organs through prolonged or repeated exposure, causes skin irritation and may cause respiratory irritation. 1-octanol: very toxic to aquatic life with long lasting effects, causes serious eye damage, harmful if swallowed and in contact with skin, highly flammable, may cause respiratory irritation and may cause drowsiness or dizziness | Synthetic surfactant and co-surfactant                                     | Cetrimide: \$ 1-10/kg         | [69]       |
| Dyes in water                           | Rhamnolipids                                                    | Salt (NaCl at ~1-2 M, Na <sub>2</sub> SO <sub>4</sub> , ~0.5-1.5M or NH <sub>4</sub> CH <sub>3</sub> CO <sub>2</sub> ~0.5-1.5M | -                                                                                                                                                                                                                                                                                                                                                                                                                                                                     | -                                                                          | \$ 20-25/kg                   | This study |

<sup>a</sup> Percentage of each compound in the synthesis mixture.

<sup>b</sup> In the case of water-induced coacervation, water volume per sample and H<sub>2</sub>O/solvent volume ratio are indicated.

<sup>c</sup>EU ECHA database (hazards regarding eye or skin or respiratory irritation not included).
